# Supplementary material for: Ultrasensitive photodetectors exploiting electrostatic trapping and percolation transport
Source: PubMed Central journal article supplement (PMC4919514; doi:10.1038/ncomms11924), 2016-06-21
Supplement: ncomms11924-s2.pdf [file ncomms11924-s2.pdf]

Editorial Note: this manuscript has been previously reviewed at another journal that is not operating a transparent peer review scheme.
